# Supplementary material
Source: PubMed Central journal article supplement (PMC7259527)
Supplement: jciinsight-5-136653-s073.pdf [file jciinsight-5-136653-s073.pdf]

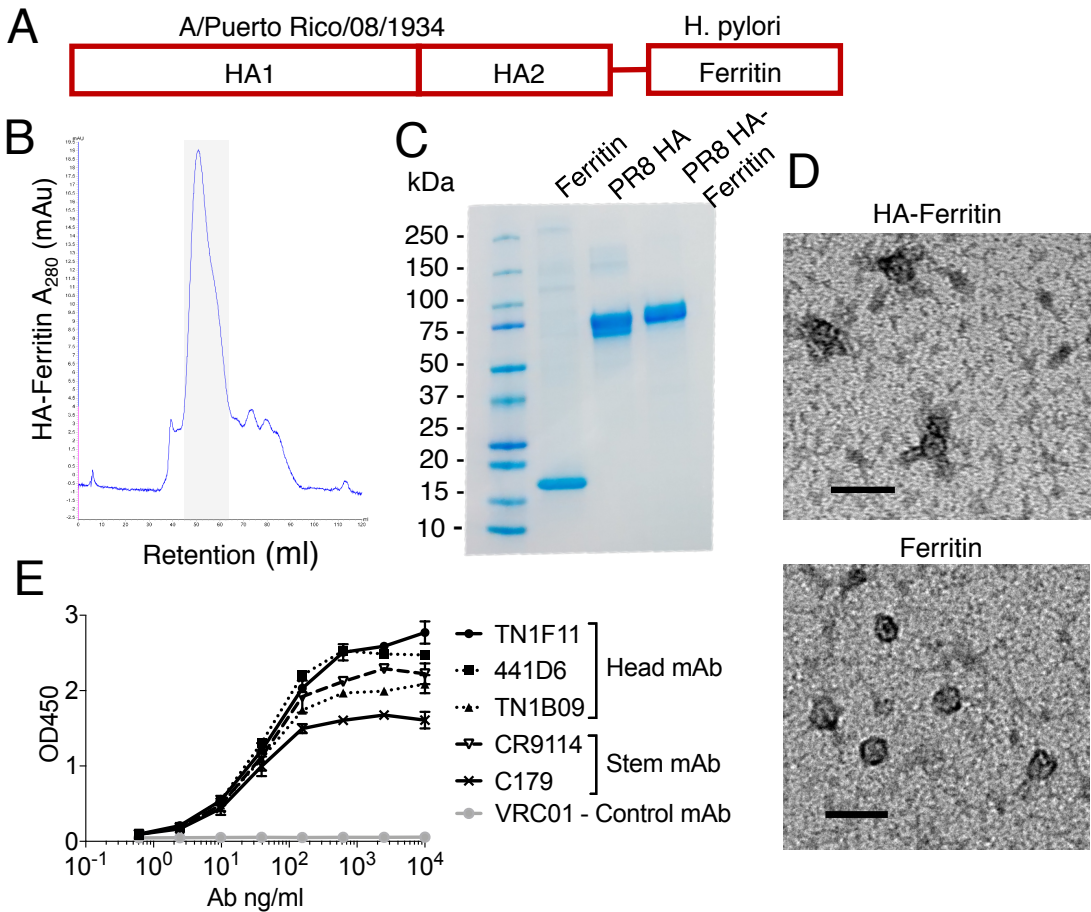

**Supplemental Figure 1. Design and characterization of PR8 HA-ferritin nanoparticles.** (A) Schematic of PR8 HA gene fused to ferritin from *Helicobacter pylori*. (B) Size exclusion chromatography (greyed area signifies retained fractions) of HA-ferritin. (C) SDS PAGE showing HA-ferritin with expected molecular weight of 85 kDa. (D) Negatively stained TEM images of purified HA-ferritin and ferritin nanoparticles confirming expected particle size of 37nm and 14nm, respectively. Scale bar 30nm. (E) Antigenicity of HA-ferritin was confirmed by binding of mAbs specific to the head (TN1F11, 446D1 and TN1B09) and stem (C179, CR9114) of influenza PR8 HA in an ELISA.

**A** HA-ferritin 3.8  $\mu\text{g}$

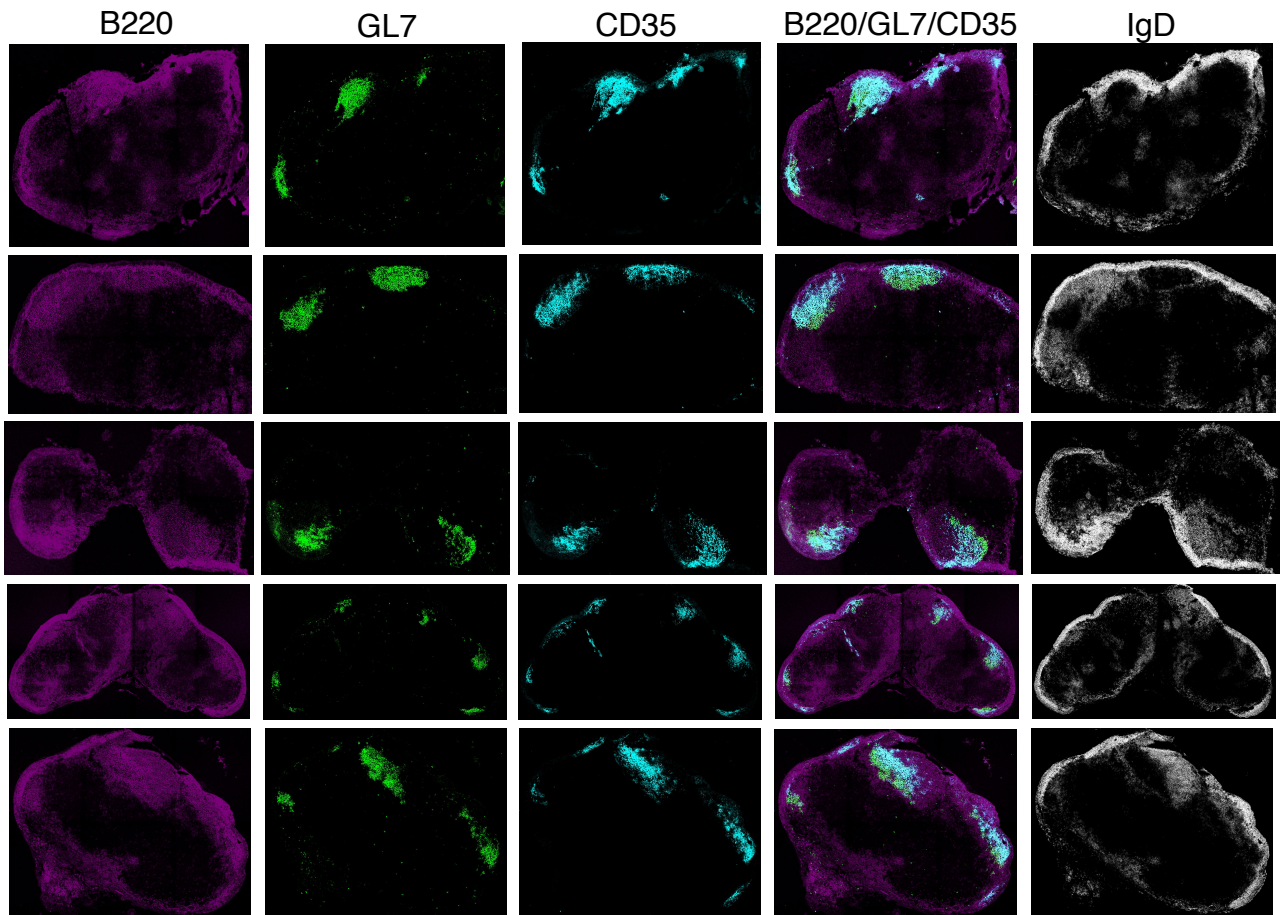

**B** HA-ferritin 0.38  $\mu\text{g}$

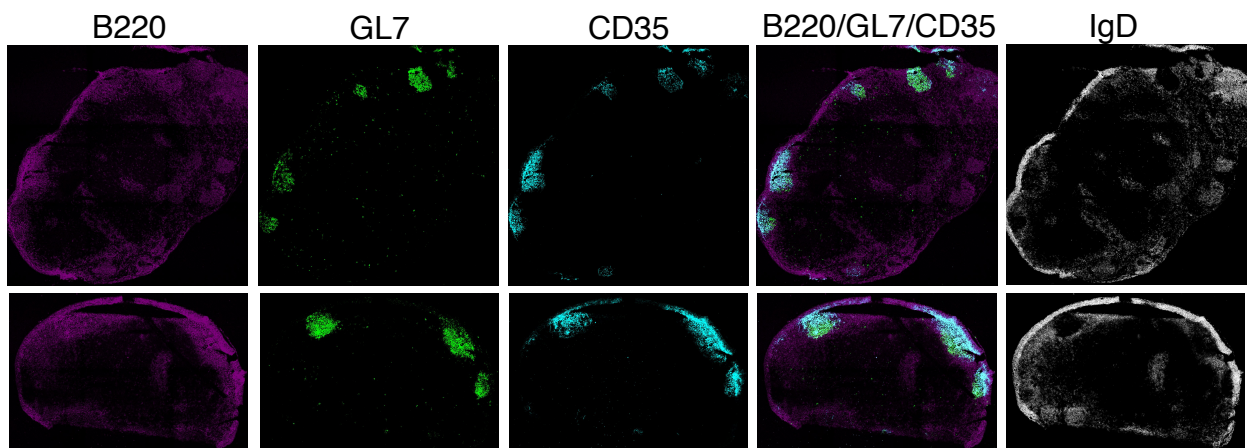

C Soluble HA 3.8  $\mu\text{g}$

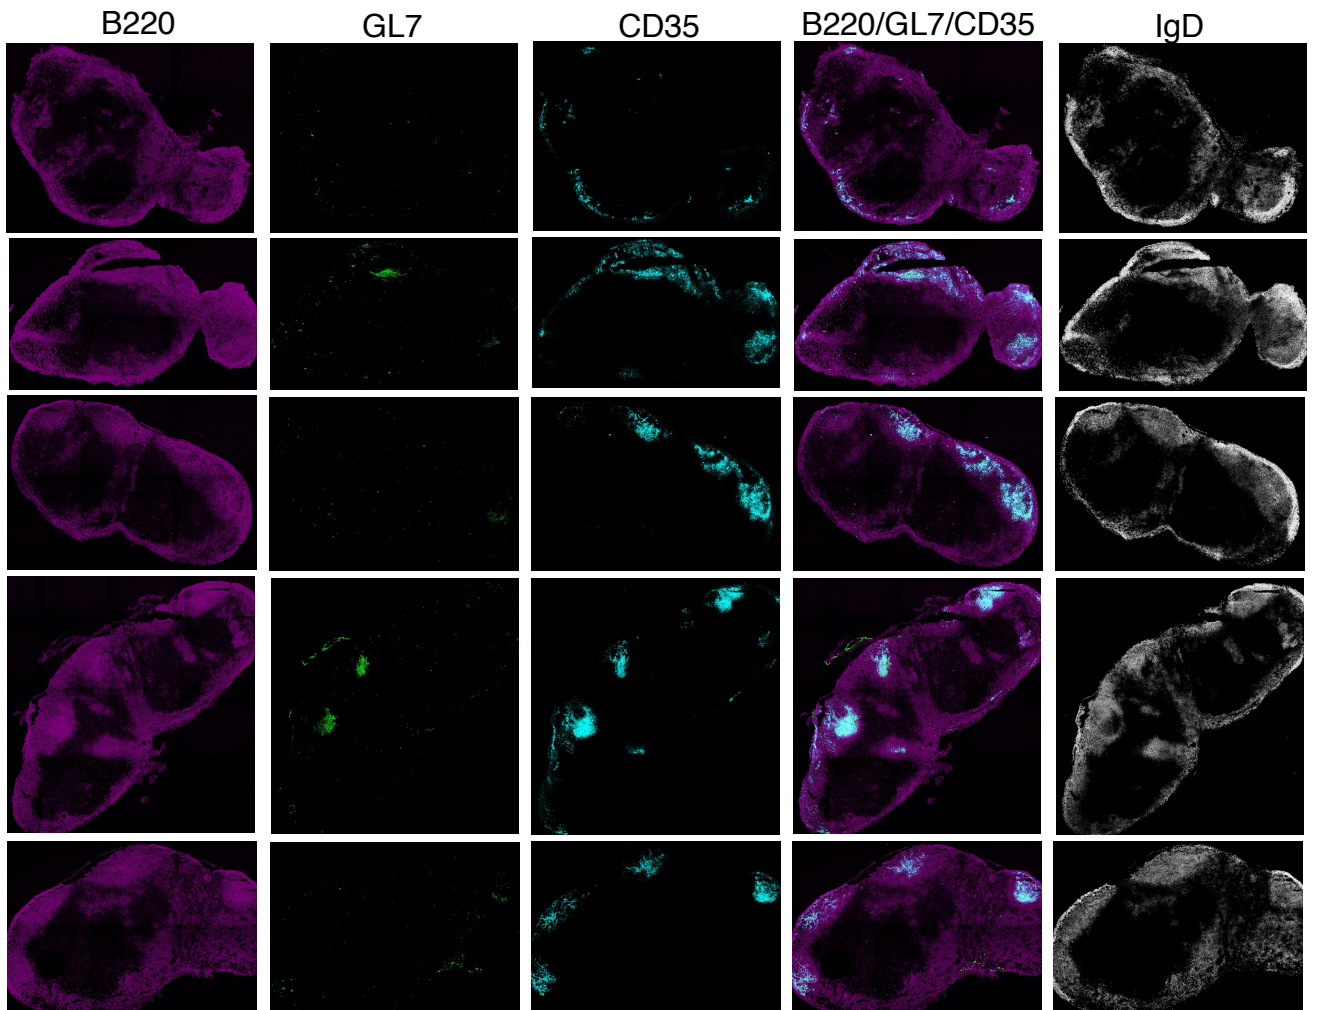

D Soluble HA 0.38  $\mu\text{g}$

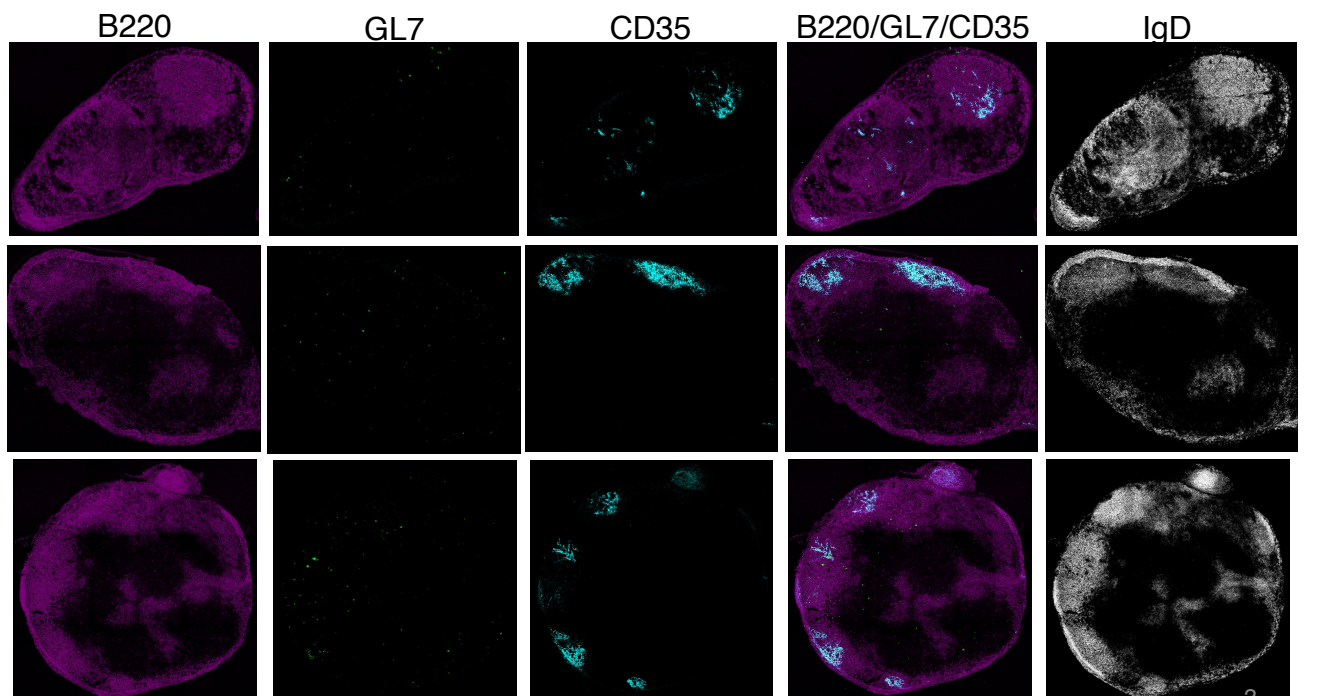

**E** Ferritin 1.2  $\mu\text{g}$

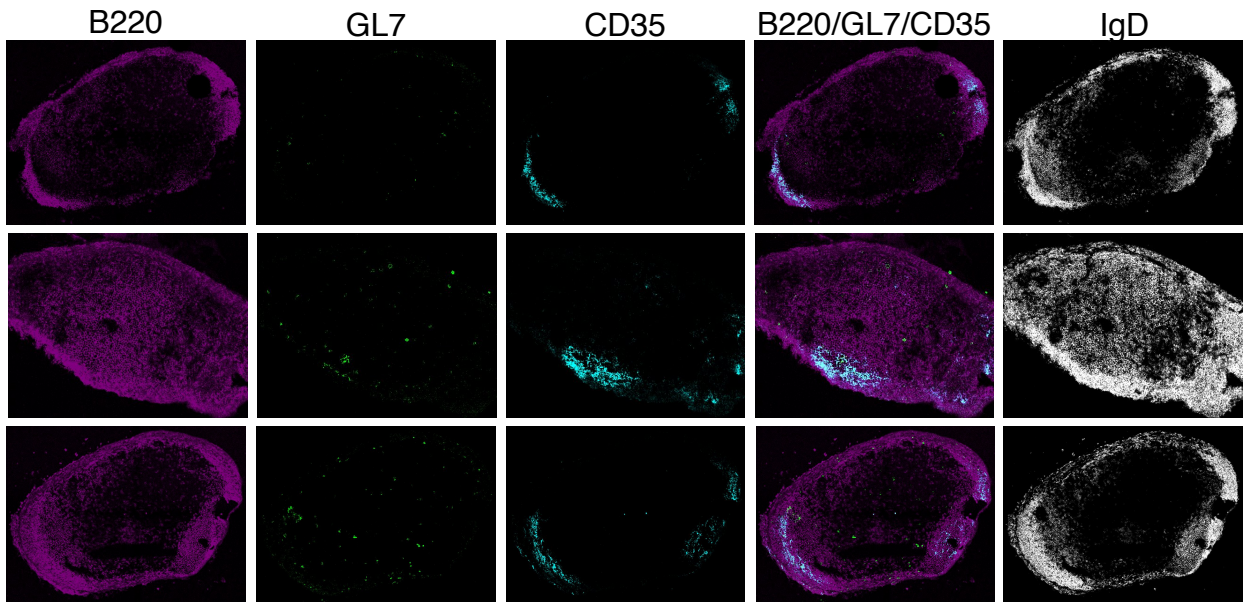

**F** PBS

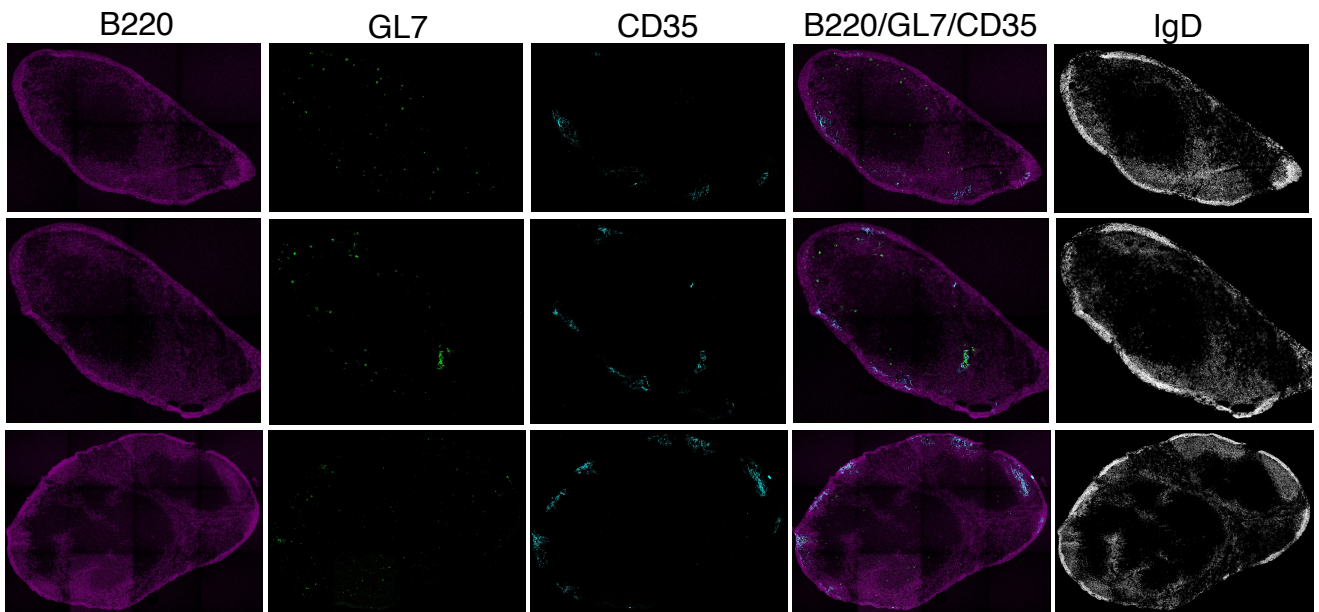

**Supplemental Figure 2. Confocal microscopy evaluation of germinal centers in lymph nodes.** C57Bl/6 ( $n = 5$  mice per group) mice were immunized with **(A)** high dose HA-ferritin ( $5 \mu\text{g}$ ), **(B)** low dose HA-ferritin ( $0.5 \mu\text{g}$ ), **(C)** molar equivalent of high dose soluble HA ( $3.8 \mu\text{g}$ ), **(D)** low dose soluble HA ( $0.38 \mu\text{g}$ ), **(E)**  $1.2 \mu\text{g}$  ferritin, all adjuvanted with AddaVax or **(F)** PBS alone. Draining inguinal lymph nodes were excised, sectioned and stained with antibodies to identify B cells (B220; magenta), germinal centers (GL7; green), follicular dendritic cells (CD35; blue), and class switching (IgD; white).

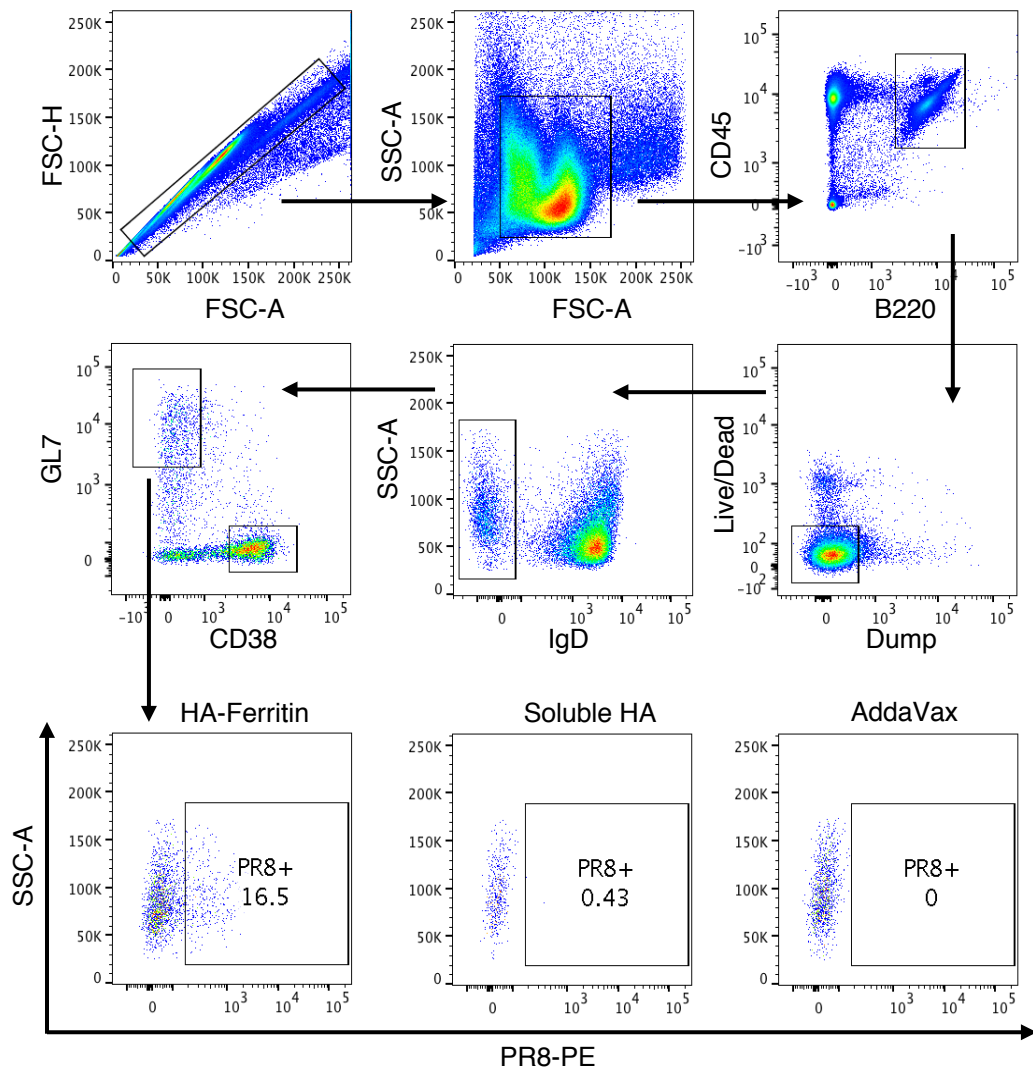

**Supplemental Figure 3. Identification of HA-specific germinal center B cells in mouse lymph nodes.** Germinal center cells in lymph node suspensions were gated as singlets, lymphocytes, CD45<sup>+</sup>B220<sup>+</sup>, live, IgD<sup>-</sup>, GL7<sup>+</sup> using flow cytometry. PR8 HA-Biotin labelled with Streptavidin-PE was used to probe for HA-specific B cells. Representative examples of probe staining in lymph node cells from mice vaccinated with ferritin, soluble HA and HA-ferritin are shown.

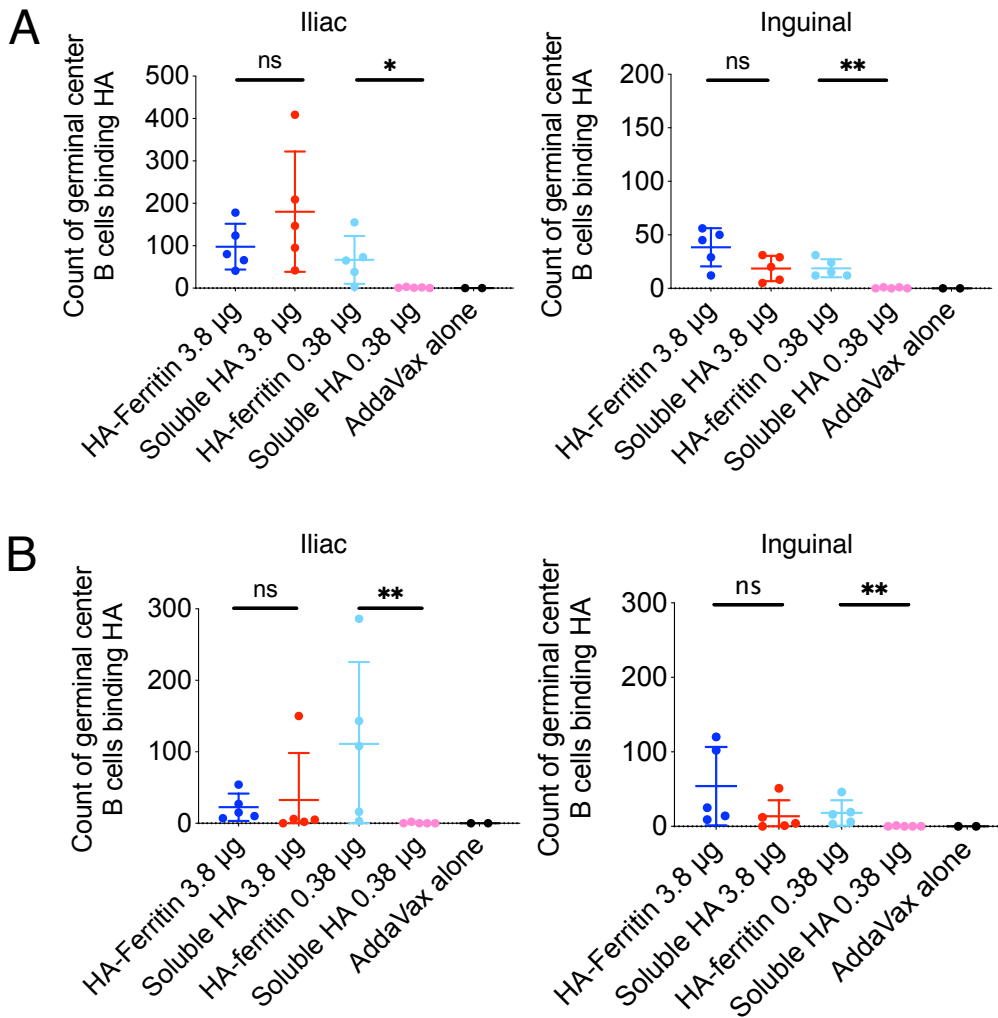

**Supplemental Figure 4. Frequencies of HA-specific germinal center B cells at early timepoints following vaccination.** C57Bl/6 ( $n = 5$  mice per group) mice were immunized with HA-ferritin (5 or  $0.5 \mu\text{g}$ ) or a molar equivalent of soluble HA ( $3.8$  or  $0.38 \mu\text{g}$ ), adjuvanted with AddaVax. At 14 days post vaccination, the absolute count of HA-specific germinal center B cells in draining ilioc (left) and inguinal (right) lymph nodes at 7 (**A**) and 14 (**B**) days post vaccination was determined using a probe of biotinylated PR8 HA labelled with streptavidin-PE. Data represent mean  $\pm$  SD and are representative of one experiment. \* $p < 0.05$ , \*\* $p < 0.01$ , determined by a Mann-Whitney test.

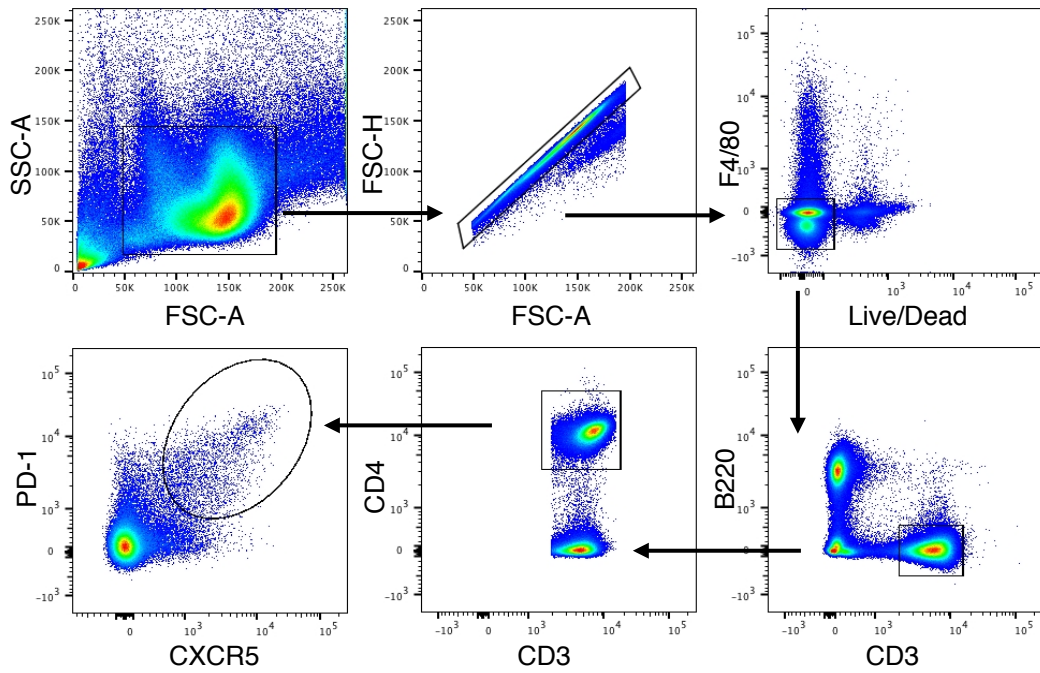

**Supplemental Figure 5. Identification of T follicular helper ( $T_{FH}$ ) cells in mouse lymph nodes *ex vivo*.**  $T_{FH}$  cells in lymph node suspensions were gated as lymphocytes, singlets, live F4/80<sup>-</sup>, CD3<sup>+</sup>B220<sup>-</sup>, CD4<sup>+</sup>, CXCR5<sup>+</sup>PD-1<sup>+</sup> using flow cytometry.

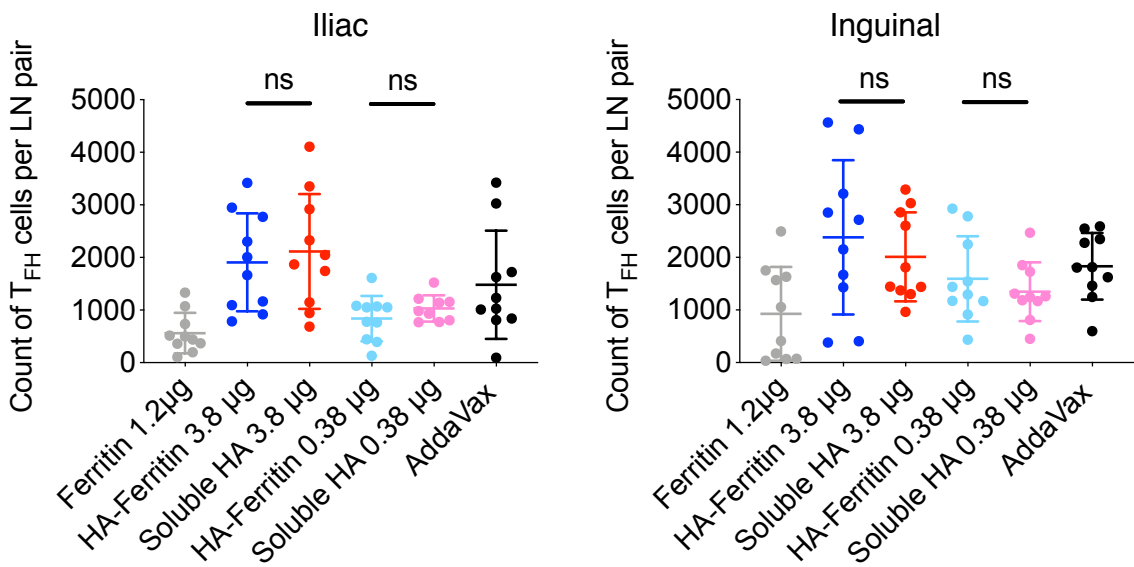

**Supplemental Figure 6. Absolute counts of T follicular helper ( $T_{FH}$ ) cells in lymph nodes after vaccination.** C57Bl/6 ( $n = 10$  mice per group) mice were immunized with HA-ferritin (5 or 0.5  $\mu\text{g}$ ) or a molar equivalent of soluble HA (3.8 or 0.38  $\mu\text{g}$ ), or 1.2  $\mu\text{g}$  ferritin alone, adjuvanted with AddaVax. 14 days following vaccination, draining iliac (left) and inguinal (right) lymph nodes were harvested. The count of  $T_{FH}$  cells (identified as  $CD4^+CXCR5^+PD-1^+$ ) per lymph node pair was determined by flow cytometry. Data shown are combined from two independent experiments. Data represent mean  $\pm$  SD. Significance determined by a Mann-Whitney test.



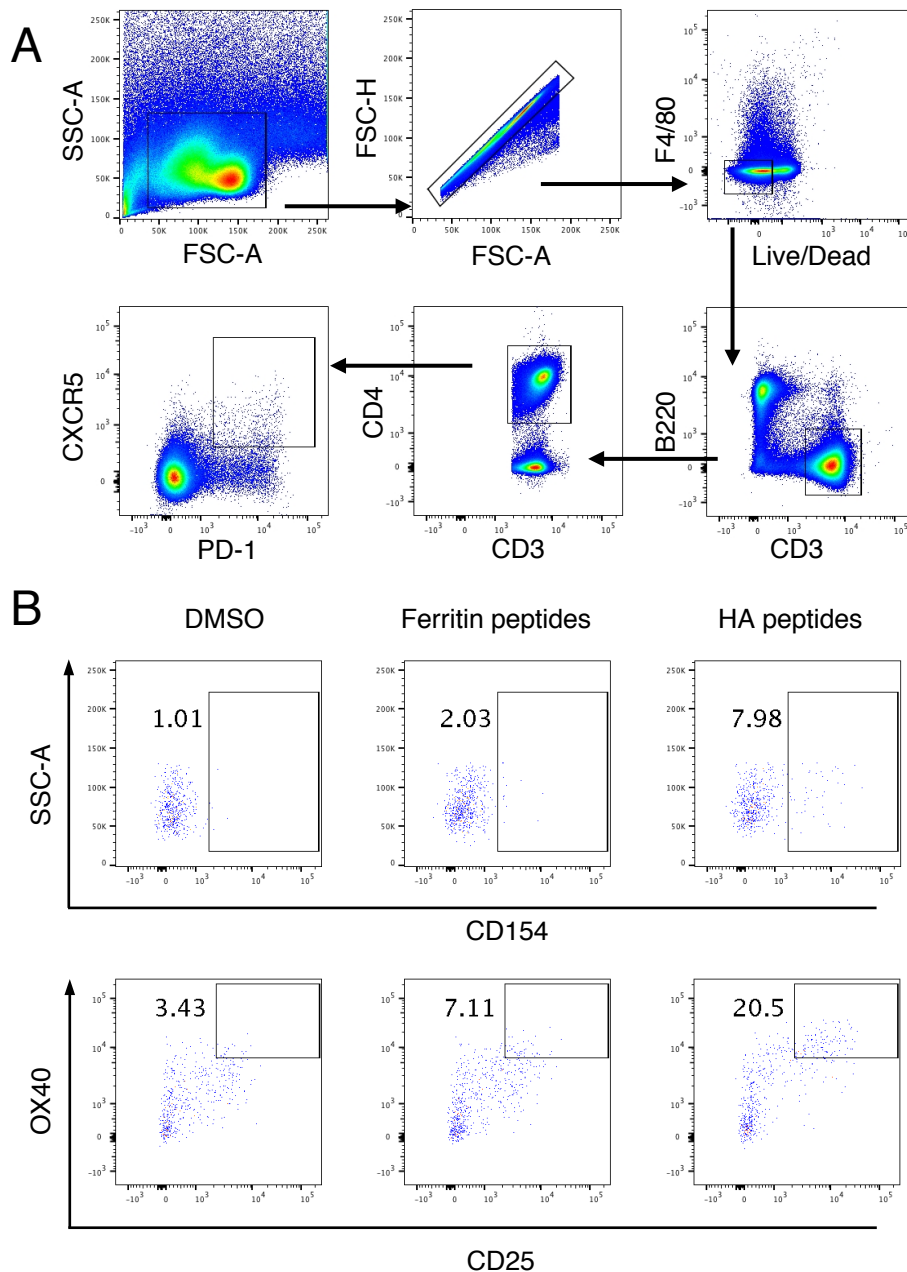

**Supplemental Figure 7. Identification of activated T follicular helper ( $T_{FH}$ ) cells following *in vitro* stimulation.** (A) Following 18 h stimulation of mouse lymph node suspensions with HA or ferritin peptide pools or DMSO control,  $T_{FH}$  cells were gated on as lymphocytes, singlets, live F4/80<sup>-</sup>, CD3<sup>+</sup>B220<sup>-</sup>, CD4<sup>+</sup>, CXCR5<sup>+</sup>PD-1<sup>+</sup> using flow cytometry. (B) Representative examples of TFH activation following DMSO, ferritin or HA peptide stimulation is shown with gates indicating CD154<sup>+</sup> or CD25<sup>++</sup>OX40<sup>++</sup> cells.

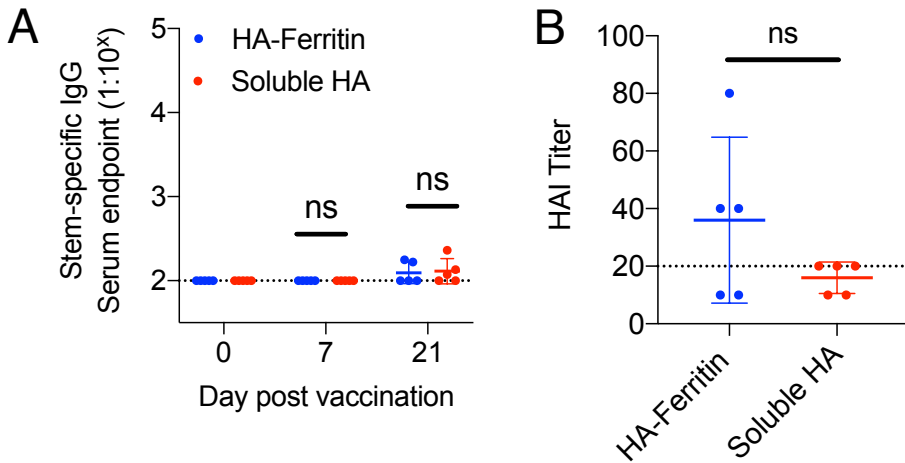

**Supplemental Figure 8. Stem HA-specific antibody and HAI titers in vaccinated macaques.** Pigtail macaques ( $n = 5$ ) were vaccinated once intramuscularly with HA-ferritin ( $15 \mu\text{g}$ ) or a molar equivalent of soluble HA ( $11.25 \mu\text{g}$ ), both adjuvanted with AddaVax. A control group received AddaVax alone ( $n = 2$ ). Sera was collected at 0, 7 and 21 days post vaccination. **(A)** Serum IgG titers against HA stem were measured by capture ELISA. **(B)** Serum HAI titers against PR8 virus were measured at 21 days post vaccination. The dashed lines indicate detection cutoff (1:100 dilution for ELISA, 1:20 for HAI assay). Data represent mean  $\pm$  SD. Significance was determined by a Mann-Whitney test.

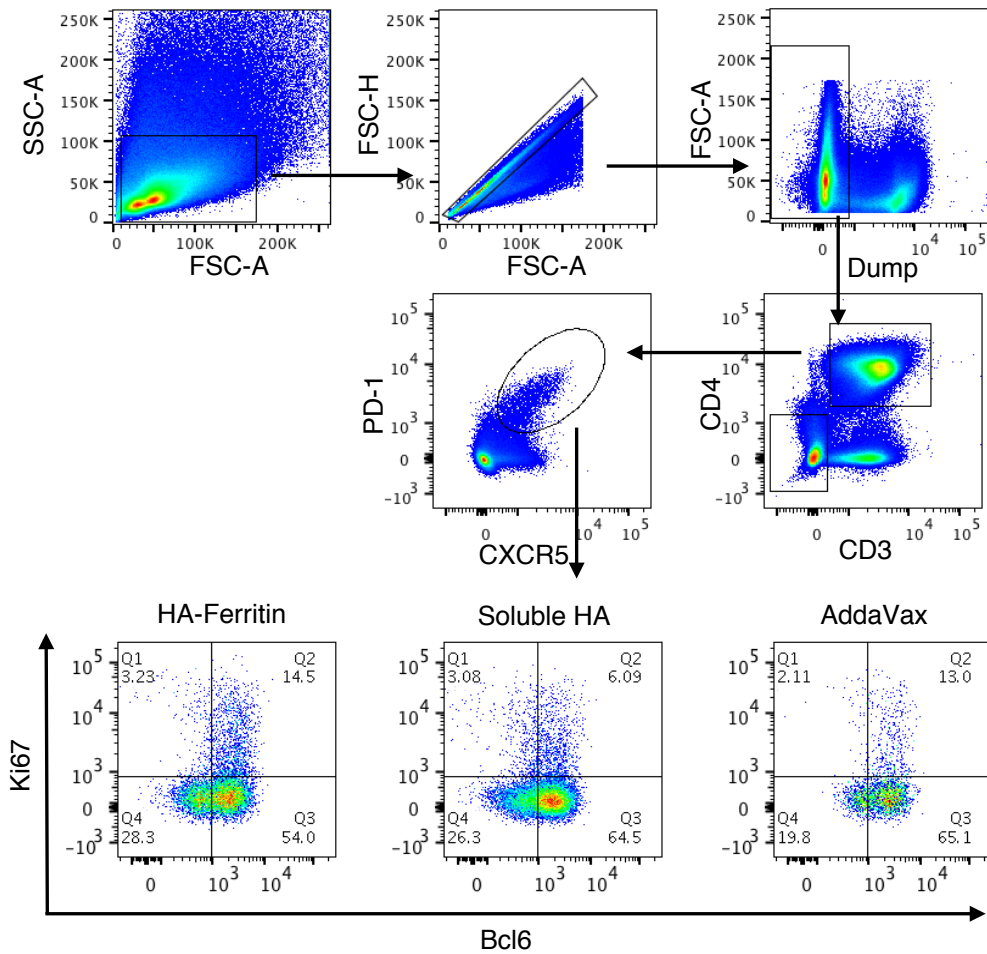

**Supplemental Figure 9. Identification of activated T follicular helper (T<sub>FH</sub>) cells in macaque lymph nodes.** Activated T<sub>FH</sub> cells in lymph node suspensions were gated as lymphocytes, singlets, live, CD3<sup>+</sup>CD4<sup>+</sup>,CXCR5<sup>+</sup>PD-1<sup>+</sup>, Bcl6<sup>+</sup>Ki67<sup>+</sup> using flow cytometry. Representative examples of probe staining from macaques vaccinated with HA-ferritin, soluble HA and AddaVax alone are shown.

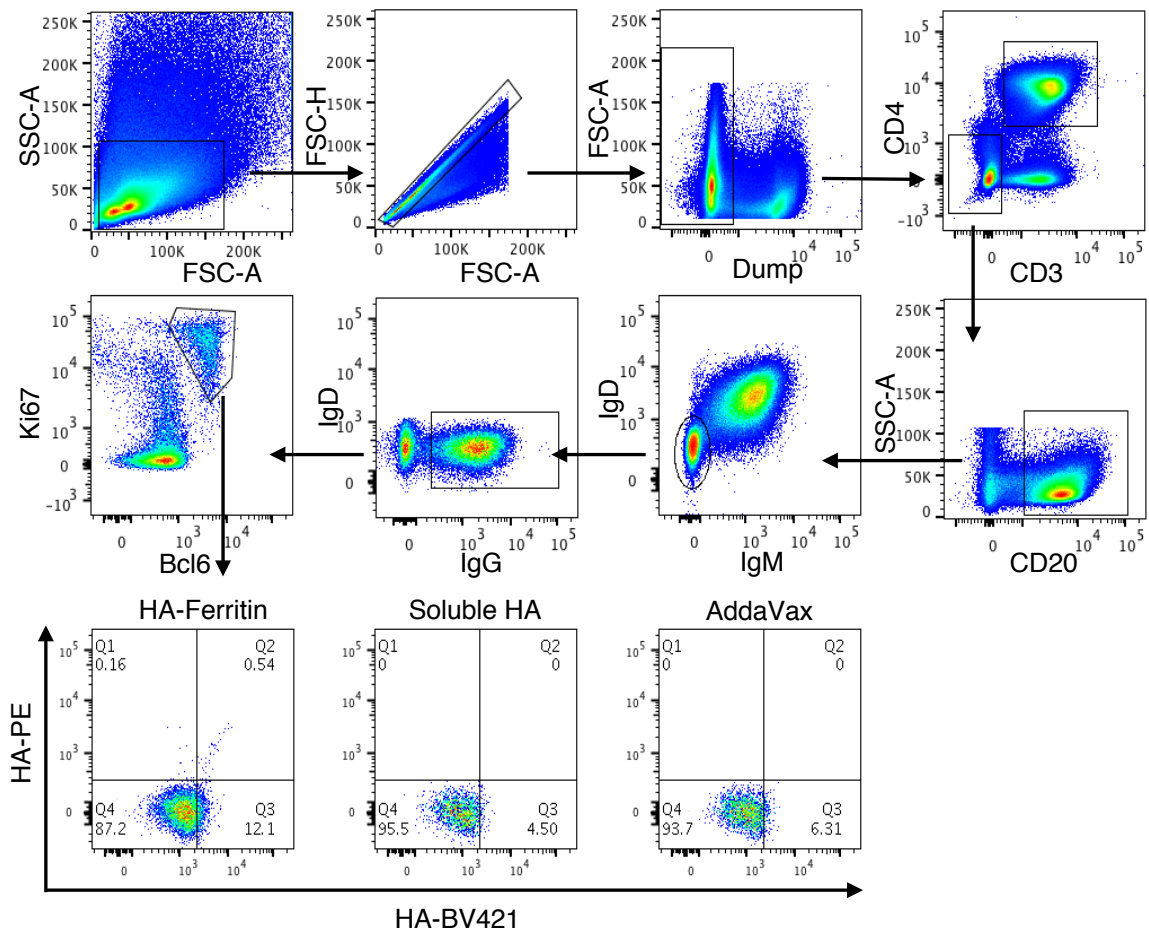

**Supplemental Figure 10. Identification of germinal center B cells in macaque lymph nodes.** Germinal center B cells in lymph node suspensions were gated as lymphocytes, singlets, live, CD3<sup>-</sup>CD4<sup>-</sup>, CD20<sup>+</sup>, IgM<sup>-</sup>IgD<sup>-</sup>, IgG<sup>+</sup>, Bcl6<sup>+</sup>Ki67<sup>+</sup> using flow cytometry. PR8 HA-biotin labelled with streptavidin-PE and streptavidin-BV421 was used to probe for HA-specific B cells. Representative examples of probe staining from macaques vaccinated with HA-ferritin, soluble HA and AddaVax alone are shown.

**Supplemental Videos. 3D antigen localization of antigen in the draining lymph nodes.** C57Bl/6 mice ( $n = 2$  per group) were immunized with AF647-labelled HA-ferritin ( $5 \mu\text{g}$ ) (**Video 1**) or a molar equivalent of AF647-labelled soluble HA ( $3.8 \mu\text{g}$ ) (**Video 2**), both adjuvanted with AddaVax. 14 days later, draining inguinal lymph nodes were fixed, stained (IgD, yellow; CD35, blue), cleared and imaged by lightsheet microscopy. Co-localization of antigen with CD35<sup>+</sup> follicular dendritic cells within germinal centers is observed following vaccination with HA-ferritin but not soluble HA.
